# Supplementary material
Source: PubMed Central journal article supplement (PMC2746133)
Supplement: jcs.034298_8.pdf [file jcs.034298_8.pdf]

**Table S1.** shRNA sequences selected for insertion into pSIREN

| <b>Subunit</b>      | <b>GenBank</b> | <b>Nucleotide sequence</b>                        | <b>Amino acids</b>                    |
|---------------------|----------------|---------------------------------------------------|---------------------------------------|
| <b>V0-c</b>         | M64298.1       | <sup>311</sup> CCATCATCCCAGTGGTTAT <sup>329</sup> | <sup>104</sup> SIIPVVM <sup>110</sup> |
| <b>V0-c'=b=f255</b> | NM_033617      | <sup>255</sup> GGCCTAGCAATTTCTCTGT <sup>273</sup> | <sup>86</sup> GLAISLS <sup>92</sup>   |
| <b>V0-c'=b=f470</b> | NM_033617      | <sup>470</sup> TGGCCATCGAAACTACCAT <sup>488</sup> | <sup>158</sup> GHRNYHA <sup>164</sup> |
| <b>V0-c'=b=f661</b> | NM_033617      | <sup>661</sup> GGGTCATTGTTGCAATCCT <sup>679</sup> | <sup>221</sup> GVIVAIL <sup>227</sup> |
| <b>V0-a1</b>        | AF218249       | <sup>343</sup> CAGGAAGCTCTGAAGAGAA <sup>361</sup> | <sup>115</sup> QEALKRN <sup>121</sup> |
| <b>V0-a2</b>        | AF218252       | <sup>350</sup> AGCTGAGGAAGAACCTGTT <sup>368</sup> | <sup>116</sup> KLRKKLR <sup>123</sup> |
| <b>V1-A</b>         | NM_007508      | <sup>518</sup> GAGGAAGCGTGACTTACAT <sup>536</sup> | <sup>173</sup> RGSVTYI <sup>179</sup> |

After transfection, AtT-20 PHM-GFP cells were allowed to recover for 18-48 hours. Based on our experience with neurons expressing pSIREN shRNAs targeted to other transcripts, cells that express readily visible DsRed show sustained knockdown of the target protein (Ma et al., 2008). For the initial experiments with shRNAs targeted to the V0-c, V0-a1, V0-a2 and V1-A subunits of the V-ATPase, many cells expressing DsRed detached from the dish. The shRNAs targeted to the V0-c'=b=f subunit were better tolerated by AtT-20 cells, and all three shRNAs disrupted the cellular morphology in the TGN region to varying extents (Fig. 9).
