# Supplementary material
Source: PubMed Central journal article supplement (PMC2746133)

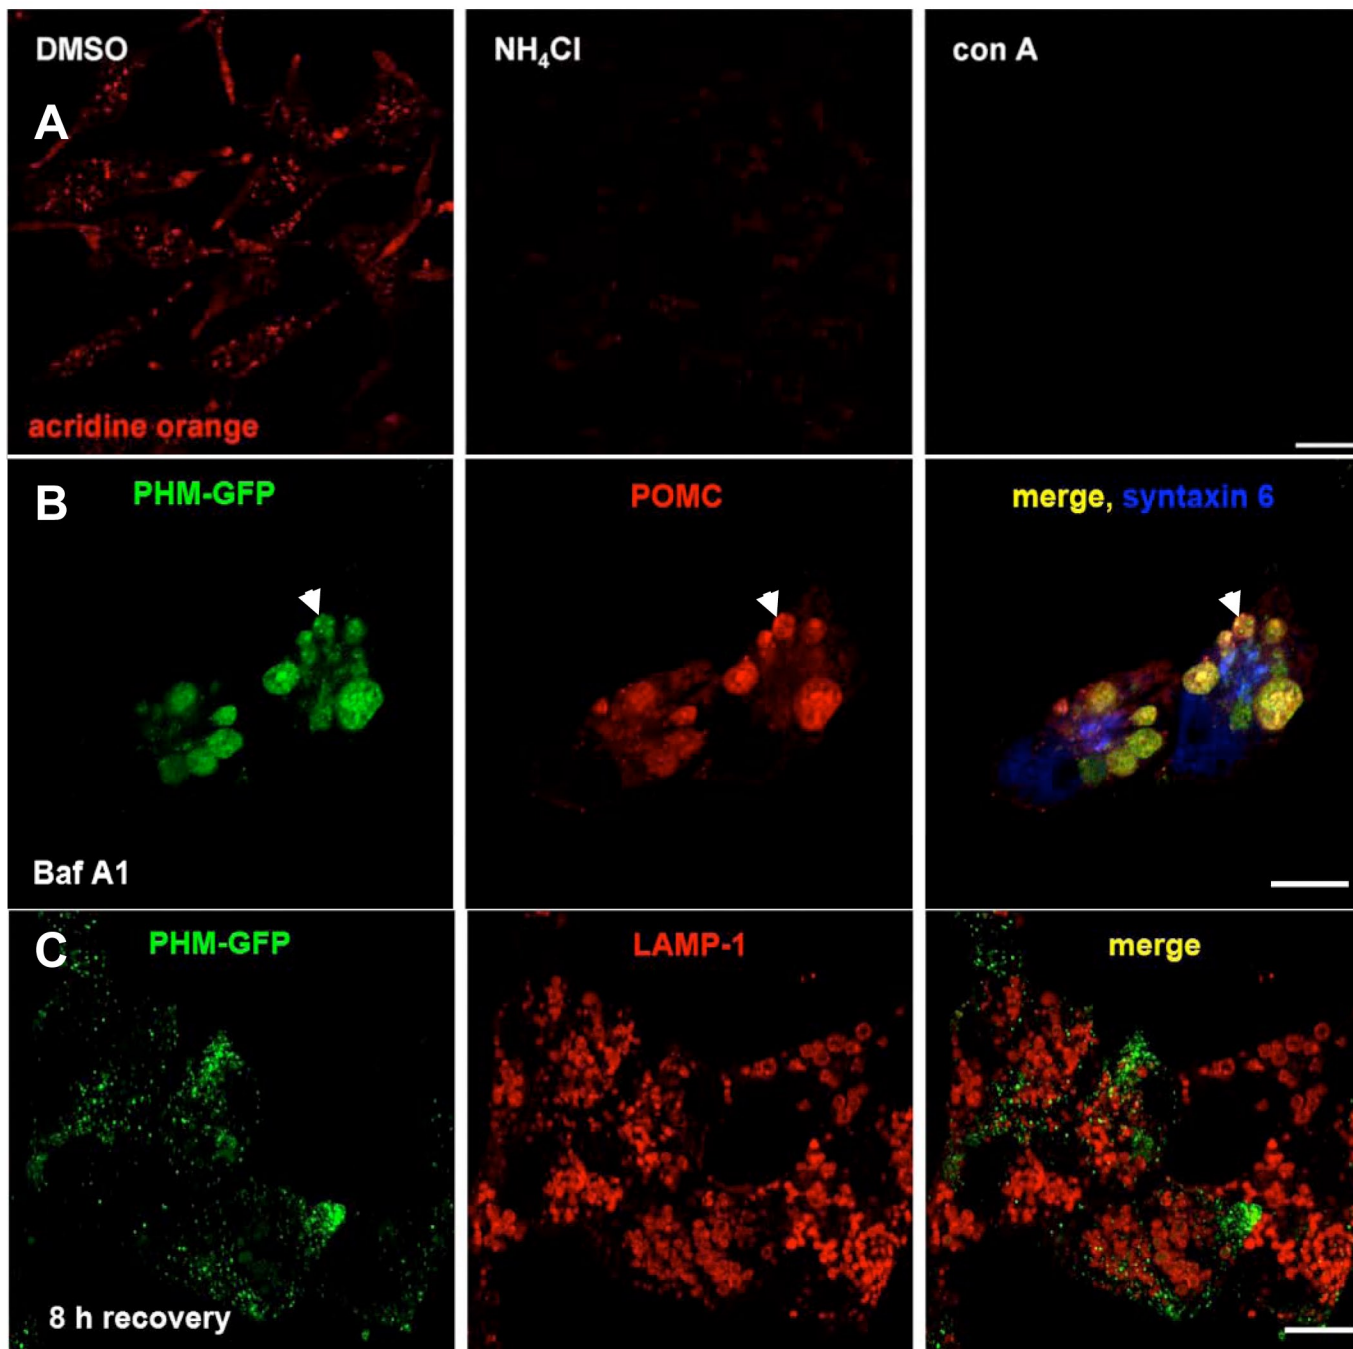

Supplement: jcs.034298_1.pdf [file jcs.034298_1.pdf]

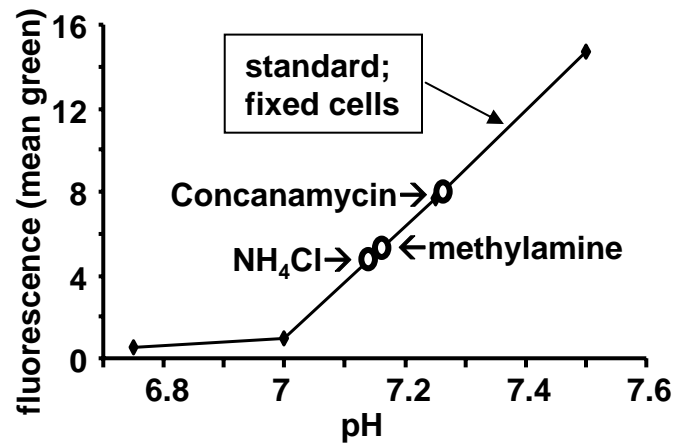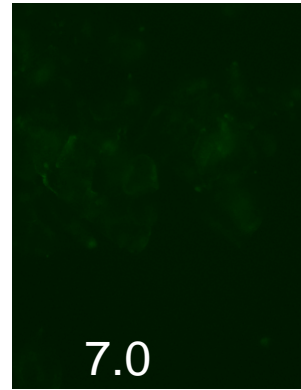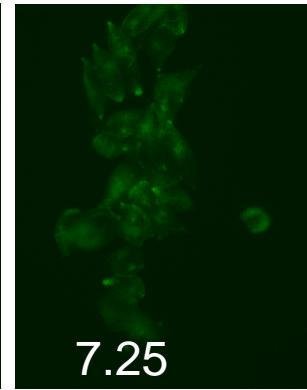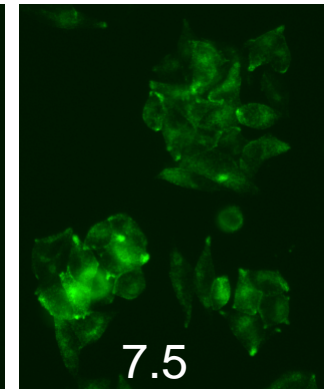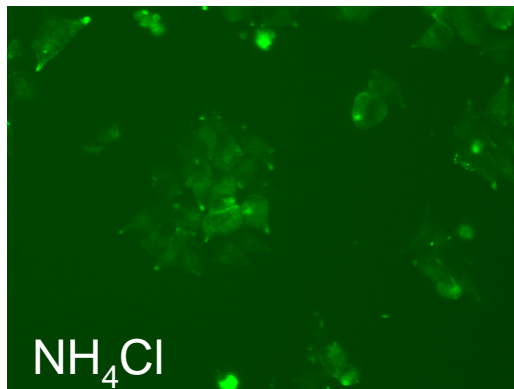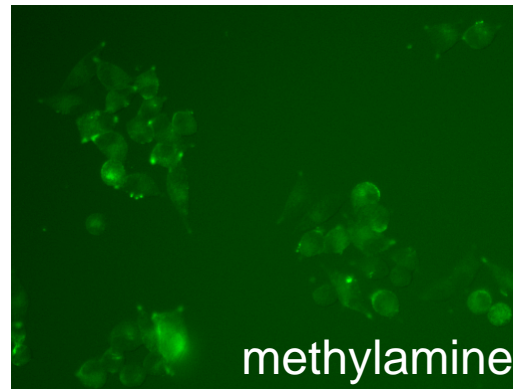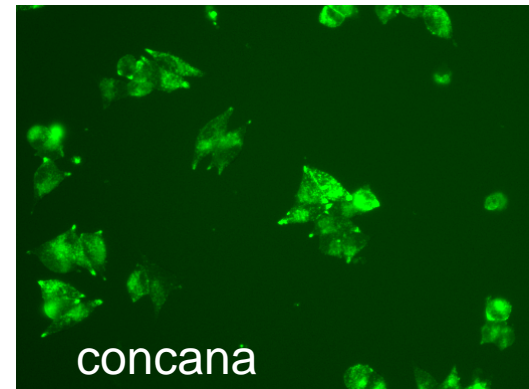

Supplement: jcs.034298_2.pdf [file jcs.034298_2.pdf]

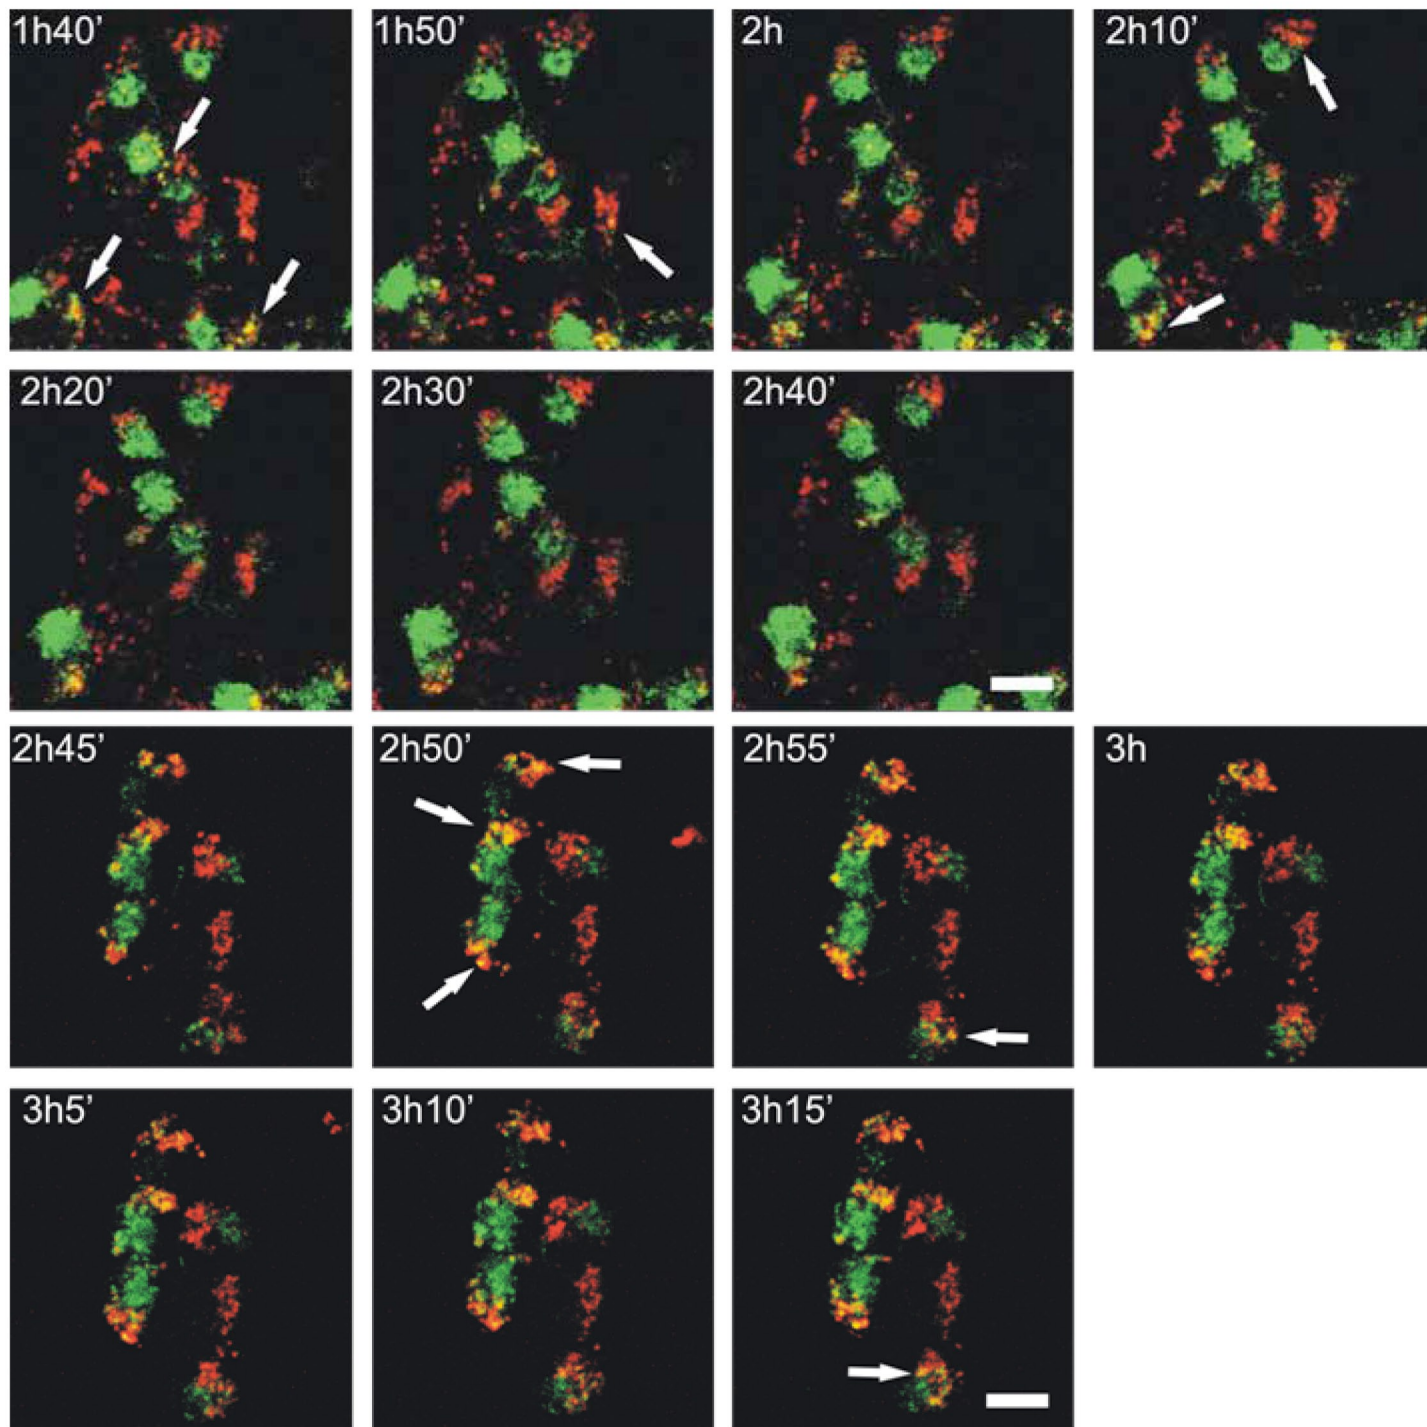

Supplement: jcs.034298_7.pdf [file jcs.034298_7.pdf]
